# Supplementary material for: Selective aqueous fluorescent probes for metal ions based on benzoyl hydrazone derivatives
Source: Royal Society of Chemistry journal article supplement (doi:10.1039/c5ay01419k), 2015-01-01

## **Selective aqueous fluorescent probe for metal ions based on benzoyl hydrazone derivatives**

Zhengyu Guo <sup>a</sup>, Haiyan Yu <sup>a</sup>, Wang Ren <sup>a</sup>, Qiusheng Wang <sup>a</sup> \*

*a Tianjin Key Laboratory of Organic Solar Cells and Photochemical Conversion, School of  
Chemistry & Chemical Engineering, Tianjin University of Technology  
Tianjin 300384, China.*

\* Corresponding author. Tel. : +86 22 60214259. E-mail address: [wangqsh@tjut.edu.cn](mailto:wangqsh@tjut.edu.cn)

## **1. Experimental Section**

- 1.1. Calculation of luminescence quantum yields -3
- 1.2. Measurements of fluorescence lifetimes -3
- 1.3. Stability of benzoyl hydrazone-based fluorescent probes. -3
- 1.4. DFT calculations of benzoyl hydrazone based derivatives and the complexes. -4

## **2. References -4**

## 1. Experimental section

### 1.1. Calculation of luminescence quantum yields.

The emission quantum efficiency was determined from the slopes of a plot between the fluorescence integral and absorbance at  $\lambda_{\max}$  of each compound compared with that of quinine sulfate in 0.1 M H<sub>2</sub>SO<sub>4</sub> (for **I**, **III**) and rhodamine B in ethanol (for **II**) used as the standard with the quantum efficiency of 0.55 and 0.65 respectively. <sup>1</sup> The fluorescence quantum yield was measured by using

$$\Phi_f = \Phi_f^0 \frac{F_s}{F_0} \frac{A_0 n_s^2}{A_s n_0^2} \quad (\text{Formula S 1. 1. 1})$$

in which F is the integrated fluorescence intensity, A is the absorbance at excitation wavelength, n is the refractive index of the solvent used, the subscript 0 stands for a reference compound and s represents samples.

### 1.2. Measurements of fluorescence lifetimes.

Measurements of the fluorescence lifetimes were performed with standard time correlated single photon counting method. <sup>2</sup> Fluorescence decay curves were recorded for 10s by TCSPC. Typically, a total of  $1-1 \times 10^4$  counts were collected in each decay curve. The fluorescence lifetimes were measured by using

$$\text{Fit} = A + B_1 e^{-\frac{t}{\tau_1}} + B_2 e^{-\frac{t}{\tau_2}} + B_3 e^{-\frac{t}{\tau_3}} + B_4 e^{-\frac{t}{\tau_4}} \quad (\text{Formula S 1.2.1})$$

to obtain the fluorescence lifetime  $\tau_n$  (n=1, 2, 3, 4). <sup>3</sup>

### 1.3. Stability of benzoyl hydrazone-based fluorescent probes.

The absorption spectra of **I**, **I**-Al<sup>3+</sup>, **II**, **II**-Cu<sup>2+</sup>, **III**, and **III**-Zn<sup>2+</sup> at time intervals of 0, 2, 6, 12, 24 and 72h in aqueous solution were obtained with an U-3900H spectrophotometer in quartz

absorption cells. The emission spectrum was recorded by F-7000 FL spectrophotometer.

#### ***1.4. DFT calculations of benzoyl hydrazone based derivatives and the complexes.***

To verify the mechanism of **I**-Al<sup>3+</sup>, **II**-Cu<sup>2+</sup> and **III**-

Zn<sup>2+</sup>, geometry optimizations were performed by Gaussian 09 program. B3LYP exchange-correlation functional <sup>4</sup> and 6-31G\* basis-

set <sup>5</sup> were employed. SMD solvation model <sup>6</sup> was used to represent water solvent environment.

## **2. References**

1. R. F. Kubin, and A. N. Fletcher, *J. Lumin.*, 1982, **27**, 455.
2. W. Becker., *Medial Photonics*, 2015, **27**, 41.
3. X. F. Zhang and Y. K. Zhang, *Dyes and Pigments*, 2015, **120**, 265.
4. P. J. Stephens, F. J. Devlin, C. F. Chabalowski, M. J. Frisch, *J. Phys. Chem.*, 1994, **98**, 11623
5. P. C. Hariharan, J. A. Pople, *Theoret. chim. Acta (Berl.)*, 1973, **28**, 213.
6. A. V. Marenich, C. J. Cramer, and D. G. Truhlar, *J. Phys. Chem. B*, 2009, **113**, 6378.

## Summary of Figures

**Figure S 1.** (left) Fluorescence spectra of probe **I** ( $\lambda_{\text{ex}}=380$  nm) in the presence of various times in aqueous solution. (right) Fluorescence intensity of probe **I** at different times in aqueous solution in the absence and presence of  $\text{Al}^{3+}$ .

**Figure S 2.** (left) Fluorescence spectra of probe **II** ( $\lambda_{\text{ex}}=454$  nm) in the presence of various times in aqueous solution. (right) Fluorescence intensity of probe **II** at different times in aqueous solution in the absence and presence of  $\text{Cu}^{2+}$ .

**Figure S 3.** (left) Fluorescence spectra of probe **III** ( $\lambda_{\text{ex}}=343$  nm) in the presence of various times in aqueous solution. (right) Fluorescence intensity of probe **III** at different times in aqueous solution in the absence and presence of  $\text{Zn}^{2+}$ .

**Figure S 4.** The decay curve of **I** ( $\lambda_{\text{abs}}=380$  nm,  $\lambda_{\text{em}}=470$  nm) in aqueous solution at ambient temperature. By using formula S 1.2.1, the lifetime of **I** was estimated with a single exponential model. Fluorescence lifetime  $\tau_f=297$  ns.

**Figure S 5.** The decay curve of **I- $\text{Al}^{3+}$**  ( $\lambda_{\text{abs}}=380$  nm,  $\lambda_{\text{em}}=470$  nm) in aqueous solution at ambient temperature. By using formula S 1.2.1, the lifetime of **I- $\text{Al}^{3+}$**  was estimated with a single exponential model. Fluorescence lifetime  $\tau_f=597$  ns.

**Figure S 6.** The decay curve of **II** ( $\lambda_{\text{abs}}=454$  nm,  $\lambda_{\text{em}}=523$  nm) in aqueous solution at ambient temperature. By using formula S 1.2.1, the lifetime of **II** was estimated with a single exponential model. Fluorescence lifetime  $\tau_f=269$  ns.

**Figure S 7.** The decay curve of **II**-Cu<sup>2+</sup> ( $\lambda_{\text{abs}}=454$  nm,  $\lambda_{\text{em}}=523$  nm) in aqueous solution at ambient temperature. By using formula S 1.2.1, the lifetime of **II**-Cu<sup>2+</sup> was estimated with a single exponential model. Fluorescence lifetime  $\tau_F=368$  ns

**Figure S 8.** The decay curve of **III** ( $\lambda_{\text{abs}}=343$  nm,  $\lambda_{\text{em}}=503$  nm) in aqueous solution at ambient temperature. By using formula S 1.2.1, the lifetime of **III** was estimated with a single exponential model. Fluorescence lifetime  $\tau_F=254$  ns.

**Figure S 9.** The decay curve of **III**-Zn<sup>2+</sup> ( $\lambda_{\text{abs}}=343$  nm,  $\lambda_{\text{em}}=503$  nm) in aqueous solution at ambient temperature. By using formula S 1.2.1, the lifetime of **III**-Zn<sup>2+</sup> was estimated with a single exponential model. Fluorescence lifetime  $\tau_F=359$  ns

**Figure S 10.** Optimized structure of **I** and **I**-Al<sup>3+</sup> by DFT calculation. The Al-N (1) bond length is 2.02 Å, Al-O (1) bond length is 1.99 Å and Al-O (2) bond length is 1.86 Å.

**Figure S 11.** Optimized structure of **II** and **II**-Cu<sup>2+</sup> by DFT calculation. The Cu-N (1) bond length is 1.97 Å, Cu-N (2) bond length is 2.01 Å, Cu-O (1) bond length is 1.99 Å, Cu-O (2) bond length is 2.46 Å, Cu-O (3) bond length is 2.09 Å and Cu-O (4) bond length is 2.19 Å.

**Figure S 12.** Optimized structure of **III** and **III**-Zn<sup>2+</sup> by DFT calculation. The Zn-N (1) bond length is 2.06 Å, Zn-N (2) bond length is 2.04 Å and Zn-O (1) bond length is 2.02 Å.

Z. Guo et al. Figure S 1.

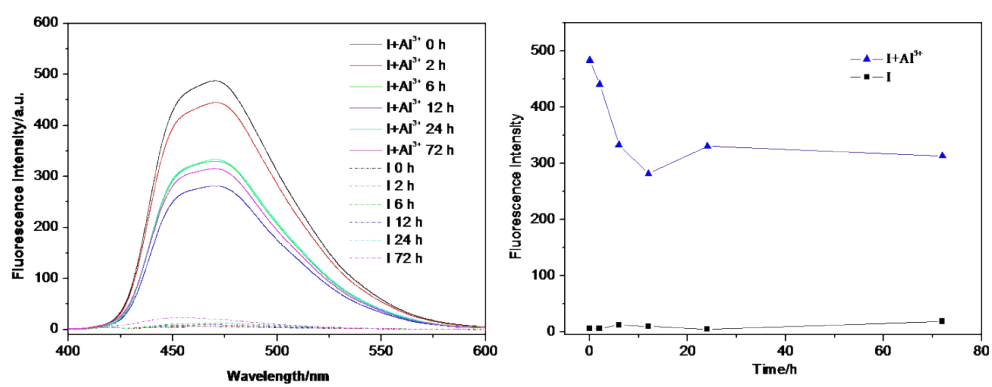

Z. Guo et al. Figure S 2.

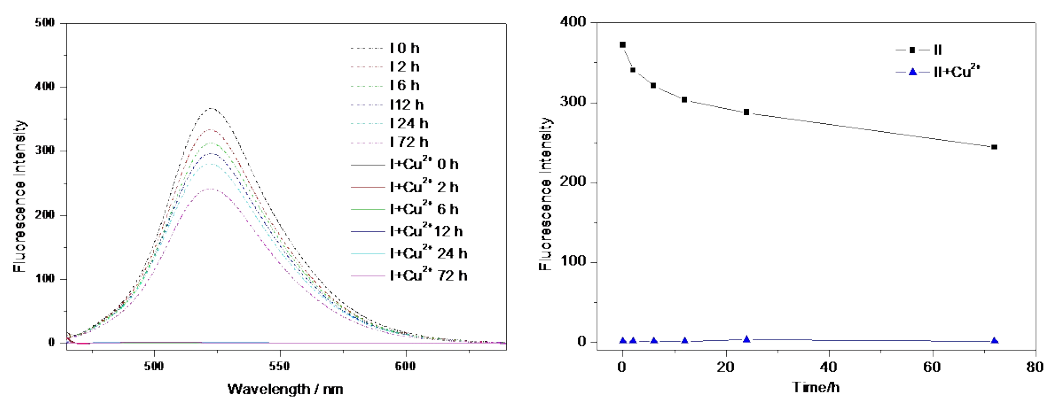



Z. Guo et al. Figure S 3.

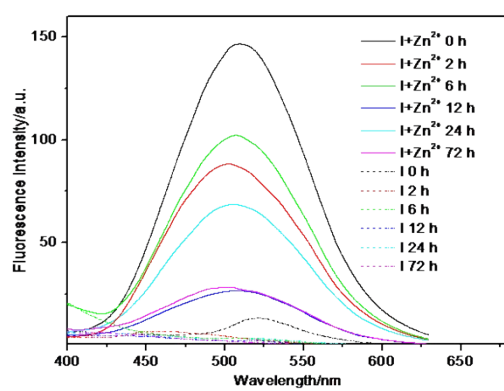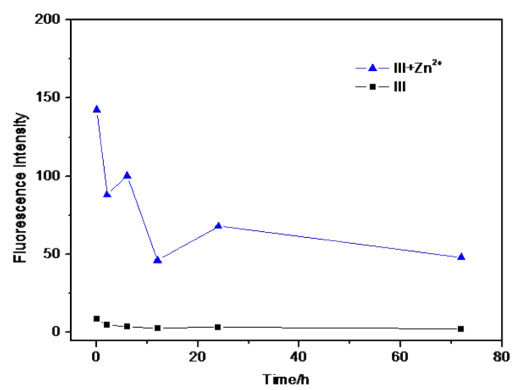

Z. Guo et al. Figure S 4.

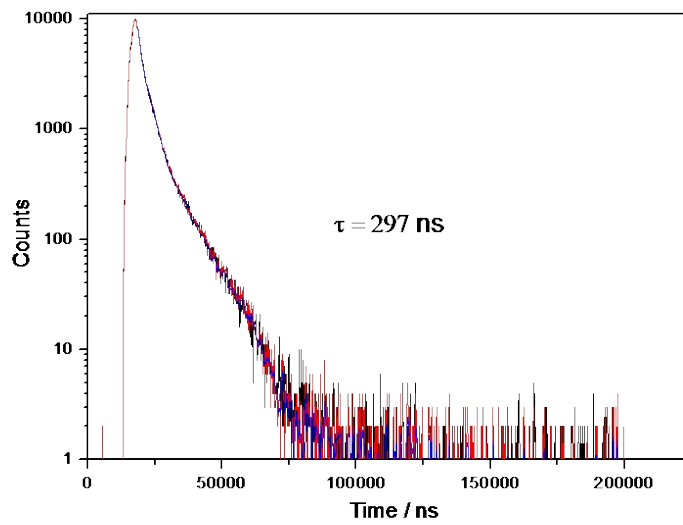

Z. Guo et al. Figure S 5.

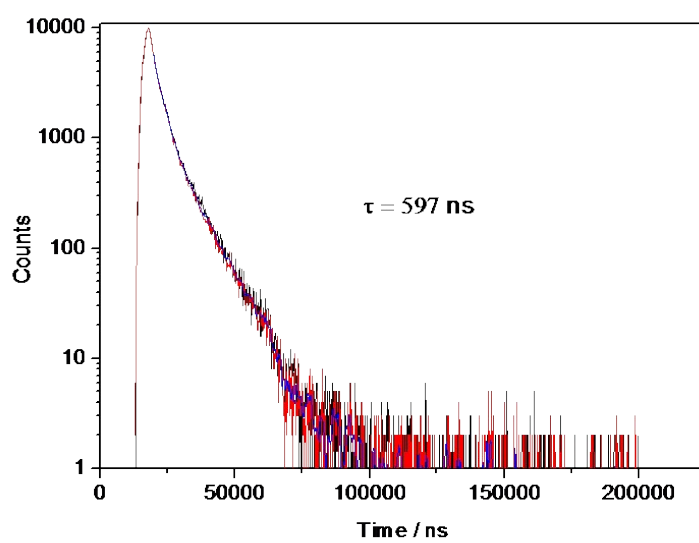

Z. Guo et al. Figure S 6.

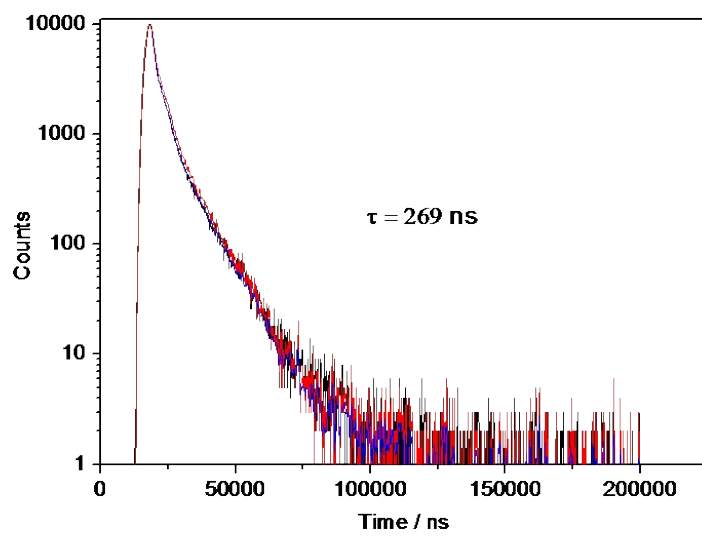

Z. Guo et al. Figure S 7.

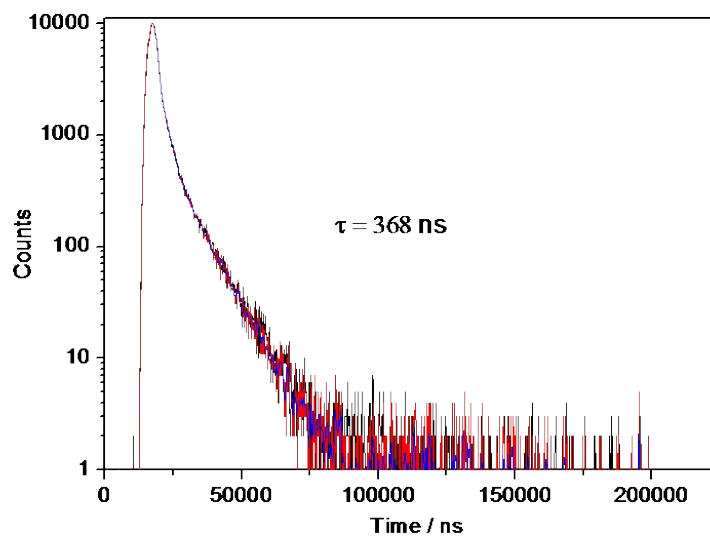

Z. Guo et al. Figure S 8.

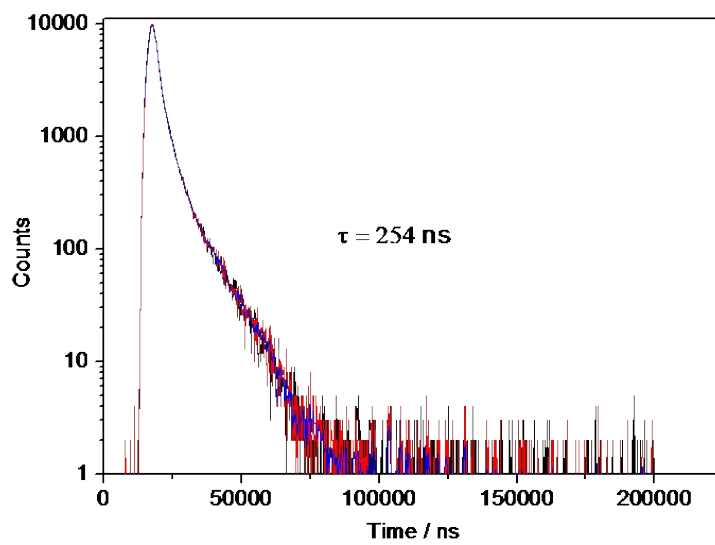

Z. Guo et al. Figure S 9.

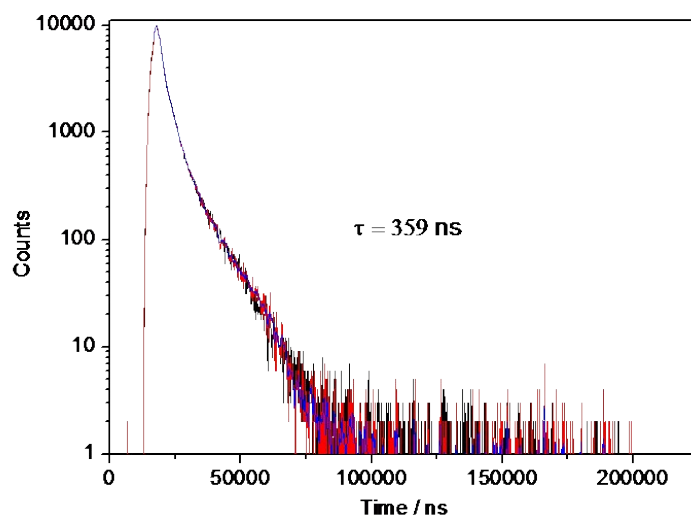

Z. Guo et al. Figure S 10.

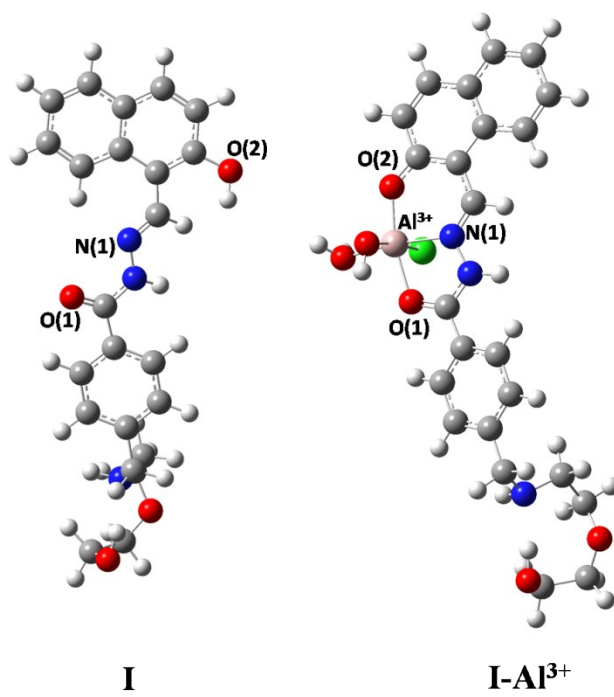



Z. Guo et al. Figure S 11.

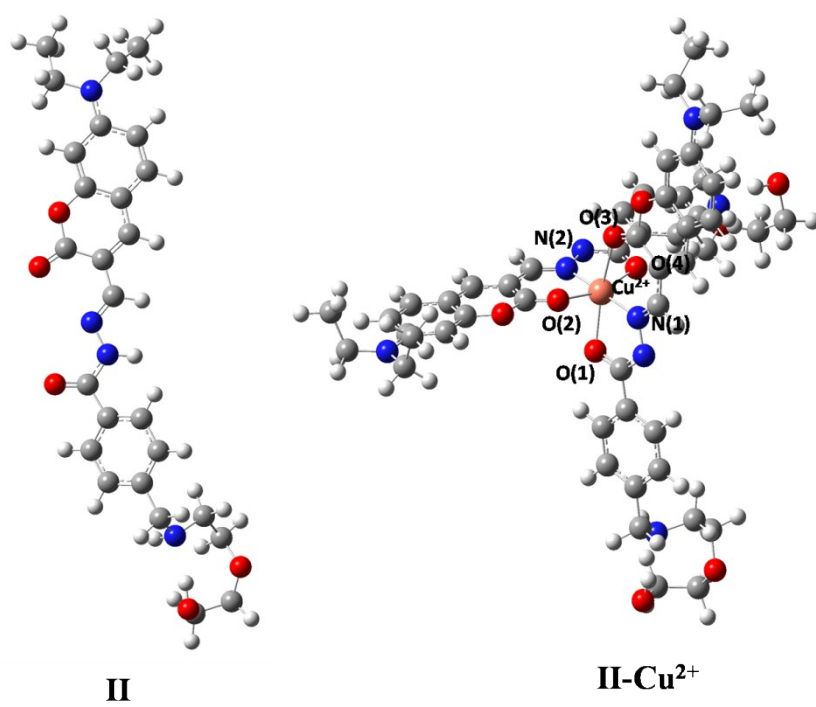

Z. Guo et al. Figure S 12.

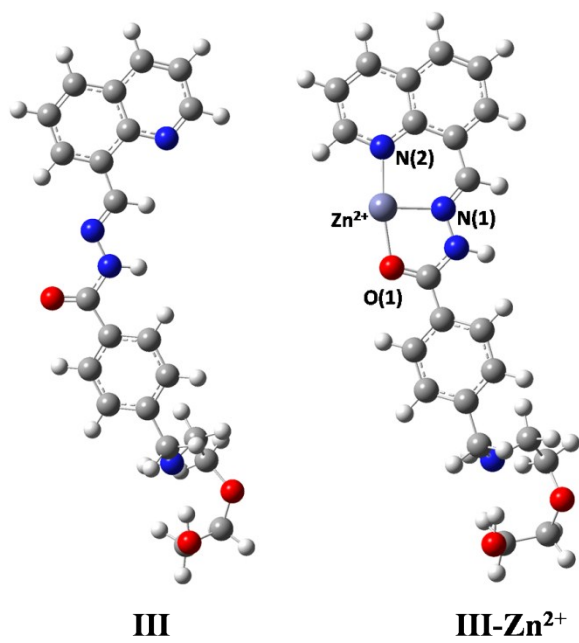

Supplement: c5ay01419k1.pdf [file c5ay01419k1.pdf]
